# Supplementary material for: Prevalence, pain intensity and symptoms associated with primary dysmenorrhea: a cross-sectional study
Source: PubMed Central journal article supplement (PMC10840141; doi:10.1186/s12905-023-02878-z), 2024-02-04
Supplement: 12905_2023_2878_MOESM1_ESM.pdf [file 12905_2023_2878_MOESM1_ESM.pdf]

1. Did you menstruate in the past 3 months?

Yes

No

2. In which Brazilian state do you currently live in?

(List of Brazilian states)

3. In which city do you live?

(short answer)

4. Marital status

Single

Married

Widow

Divorced

5. Scholarity

Up to 8 complete years

9 to 11 complete years

more than 11 complete years

6. How old were you when you first menstruated?

$\leq 10$  years old

11 years old

12 years old

13 years old

14 years old

15 years old

$\geq 16$  years old

7. What is the MEAN duration of your menstrual cycle?

less than 27 days

28-29 days

30-31 days

over 31 days

I have irregular menstrual cycles

I don't know / I don't want to answer

8. How many days does your menstruation last?

- less than 3 days
- 3 days
- 4 days
- 5 days
- 6 or more days
- I don't know / I don't want to answer

9. Have you started your sexual life?

- Yes
- No
- I don't know / I don't want to answer

10. Do you use any form of contraceptive at this present moment?

- Copper intrauterine device
- Hormonal intrauterine device
- Hormonal injection
- Oral contraceptive
- Male / female condom
- Implants
- I don't use any contraceptive methods
- I don't know / I don't want to answer

10.1. How long have you been using this method?

- less than a month
- 1-2 months
- 3-6 months
- 7-12 months
- over a year
- I don't know / I don't want to answer

10.2. This chosen methods was medically prescribed?

- Yes
- No
- I don't know / I don't want to answer

10.3. If medically prescribed, did you receive enough information on the method and its side effects?

- Yes
- No
- I don't know / I don't want to answer

11. How many pregnancies did you have?

- None
- 1
- 2
- 3
- 4
- 5 or more
- I don't know / I don't want to answer

12. Have you ever had an abortion?

- Yes
- No
- I don't know / I don't want to answer

13. Have you ever been pregnant with twins?

- Yes
- No
- I don't know / I don't want to answer

14. How many children do you have?

- None
- 1
- 2
- 3
- 4 or more
- I don't know / I don't want to answer

15. What kind of birth did you experience?

- None
- Vaginal
- Cesarean
- Vaginal and cesarean
- I don't know / I don't want to answer

16. Are you breastfeeding right now?

- Yes

No

17. On a scale of 0 to 10, with 0 being no pain and 10 being the worst pain you can imagine, how would you rate the pain you feel during your menstrual cramps? Answer the next three questions based on this scale.

### **Escala Numérica**

|         |   |   |   |   |   |   |   |   |   |   |    |            |
|---------|---|---|---|---|---|---|---|---|---|---|----|------------|
| Sem Dor | 0 | 1 | 2 | 3 | 4 | 5 | 6 | 7 | 8 | 9 | 10 | Dor Máxima |
|---------|---|---|---|---|---|---|---|---|---|---|----|------------|

17.1. What is the mean pain intensity of your menstrual cramps in the past 5 years?

(list of 0-10)

17.2. Regarding the past month, what was your menstrual pain?

(list of 0-10)

17.3. Regarding the past three months, what was your menstrual pain?

(list of 0-10)

18. Which of the options below is true for you? (You may mark more than one option)

I have had menstrual cramps since my adolescence.

My menstrual cramps are more or less similar all months.

My menstrual pain intensity has decreased over the past years.

My menstrual pain intensity has increased over the past years.

From my child's birth, my menstrual pain intensity increased.

From my child's birth, my menstrual pain intensity decreased.

I have never had menstrual cramps.

I rarely have menstrual cramps.

When I am more stressed, I have more pain related to my menstrual cramps.

19. Which symptoms do you associate with your pre-menstrual (days before your menstruation) and menstrual periods?

Cramps (I don't have) (mild) (moderate) (severe)

Headache / migraine (I don't have) (mild) (moderate) (severe)

Diarrhea (I don't have) (mild) (moderate) (severe)

Nausea (I don't have) (mild) (moderate) (severe)

Indisposition (I don't have) (mild) (moderate) (severe)

Irritability (I don't have) (mild) (moderate) (severe)

Appetite change (I don't have) (mild) (moderate) (severe)

- |                                                       |                                         |                                 |                                     |                                   |
|-------------------------------------------------------|-----------------------------------------|---------------------------------|-------------------------------------|-----------------------------------|
| <input type="checkbox"/> Abdominal distension         | <input type="checkbox"/> (I don't have) | <input type="checkbox"/> (mild) | <input type="checkbox"/> (moderate) | <input type="checkbox"/> (severe) |
| <input type="checkbox"/> Breast swelling              | <input type="checkbox"/> (I don't have) | <input type="checkbox"/> (mild) | <input type="checkbox"/> (moderate) | <input type="checkbox"/> (severe) |
| <input type="checkbox"/> Lower limbs swelling         | <input type="checkbox"/> (I don't have) | <input type="checkbox"/> (mild) | <input type="checkbox"/> (moderate) | <input type="checkbox"/> (severe) |
| <input type="checkbox"/> Decrease on sleep quality    | <input type="checkbox"/> (I don't have) | <input type="checkbox"/> (mild) | <input type="checkbox"/> (moderate) | <input type="checkbox"/> (severe) |
| <input type="checkbox"/> Skin problems such as acne   | <input type="checkbox"/> (I don't have) | <input type="checkbox"/> (mild) | <input type="checkbox"/> (moderate) | <input type="checkbox"/> (severe) |
| <input type="checkbox"/> Dizziness                    | <input type="checkbox"/> (I don't have) | <input type="checkbox"/> (mild) | <input type="checkbox"/> (moderate) | <input type="checkbox"/> (severe) |
| <input type="checkbox"/> Fainting                     | <input type="checkbox"/> (I don't have) | <input type="checkbox"/> (mild) | <input type="checkbox"/> (moderate) | <input type="checkbox"/> (severe) |
| <input type="checkbox"/> Ringing sensation in the ear | <input type="checkbox"/> (I don't have) | <input type="checkbox"/> (mild) | <input type="checkbox"/> (moderate) | <input type="checkbox"/> (severe) |
| <input type="checkbox"/> More emotive than usual      | <input type="checkbox"/> (I don't have) | <input type="checkbox"/> (mild) | <input type="checkbox"/> (moderate) | <input type="checkbox"/> (severe) |
| <input type="checkbox"/> Concentration difficulty     | <input type="checkbox"/> (I don't have) | <input type="checkbox"/> (mild) | <input type="checkbox"/> (moderate) | <input type="checkbox"/> (severe) |
| <input type="checkbox"/> Anxiety                      | <input type="checkbox"/> (I don't have) | <input type="checkbox"/> (mild) | <input type="checkbox"/> (moderate) | <input type="checkbox"/> (severe) |
| <input type="checkbox"/> Low self-esteem              | <input type="checkbox"/> (I don't have) | <input type="checkbox"/> (mild) | <input type="checkbox"/> (moderate) | <input type="checkbox"/> (severe) |
| <input type="checkbox"/> Lower limbs pain             | <input type="checkbox"/> (I don't have) | <input type="checkbox"/> (mild) | <input type="checkbox"/> (moderate) | <input type="checkbox"/> (severe) |
| <input type="checkbox"/> Low back pain                | <input type="checkbox"/> (I don't have) | <input type="checkbox"/> (mild) | <input type="checkbox"/> (moderate) | <input type="checkbox"/> (severe) |
| <input type="checkbox"/> Joint pain                   | <input type="checkbox"/> (I don't have) | <input type="checkbox"/> (mild) | <input type="checkbox"/> (moderate) | <input type="checkbox"/> (severe) |

20. Do you have any of the medical diagnosis presented?

- Endometriosis
- Polycystic ovary
- Myoma
- Cervical cancer
- Vulvar edema
- Urogynecological infection or inflammation
- Genital malformation
- Uterus prolapse
- Vulvodinia
- Adenomyosis
- I do not have any of those diagnosis
- I don't know / I don't want to answer

21. Do you use any medication of continuous use?

- Yes
- No

I don't know / I don't want to answer

21.1. In affirmative case, what kind of medication is it?

Anxiolytic

Antidepressive

Contraceptive

I don't know / I don't want to answer

22. Do you use pain killers for your menstrual pain?

Yes

No

I don't know / I don't want to answer

22.1. In affirmative case, which medications do you use?

(short answer)

22.2. For how many days do you use those medications?

1

2

3

4

5

All days during my menstruation

22.3. After using those medications, the pain:

Does not change

Has a mild improvement

Has a large improvement

Is completely resolved.
